# Supplementary material for: Hybrid single/poly-crystalline ZnO nanoawl arrays: facile synthesis and enhanced field emission properties
Source: Royal Society of Chemistry journal article supplement (doi:10.1039/c2ra22198e), 2012-01-01
Supplement: c2ra22198e.pdf [file c2ra22198e.pdf]

**Electronic Supplementary Information:**

**Hybrid single/poly-crystalline ZnO nanoawl arrays: facile synthesis and enhanced field emission properties**

**Feng Xu,<sup>†a</sup> Jing Chen,<sup>†b</sup> Yunsong Di,<sup>bc</sup> Yunkang Cui,<sup>b</sup> Jun Sun,<sup>a</sup> Litao Sun,<sup>\*a</sup> Wei Lei,<sup>b</sup> Chunxiang Xu<sup>d</sup> and Weilie Zhou<sup>\*e</sup>**

<sup>a</sup>SEU-FEI Nano-Pico Center, Key Laboratory of MEMS of Ministry of Education, Southeast University, Nanjing 210096, China. E-mail: slt@seu.edu.cn; Fax: +86-25-83792939; Tel: +86-25-83792632 ext. 8813

<sup>b</sup>Jiangsu Information Display Engineering Research Center, School of Electronic Science and Engineering, Southeast University, Nanjing 210096, China

<sup>c</sup>School of Physics and Technology, Nanjing Normal University, Nanjing 210046, China

<sup>d</sup>Electrical Engineering Division, Department of Engineering, University of Cambridge, 9 JJ Thomson Avenue, CB3 0FA, Cambridge, UK

<sup>e</sup>Advanced Materials Research Institute, University of New Orleans, New Orleans, LA 70148, USA. E-mail: wzhou@uno.edu

---

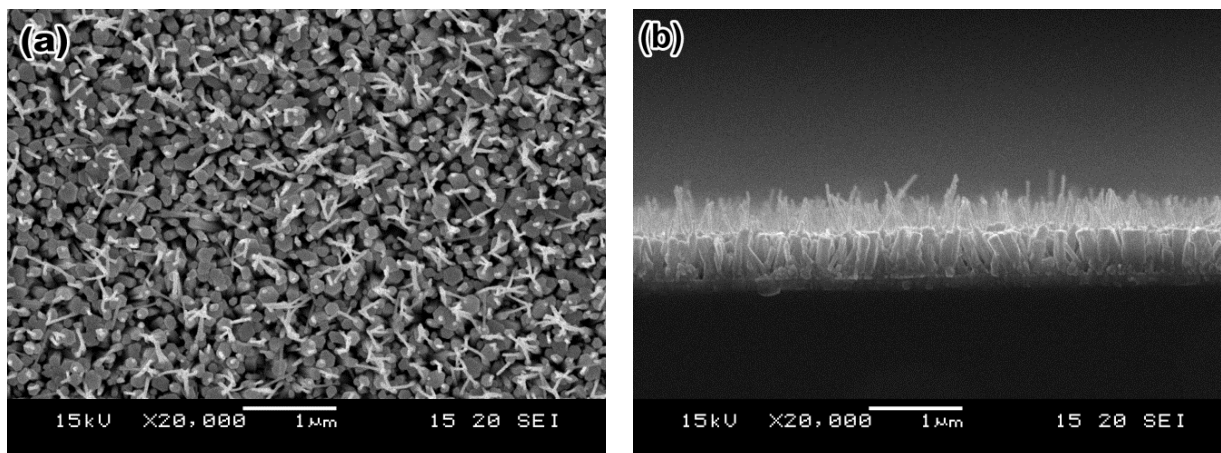

**Fig. S1** (a) Top-view and (b) cross-section SEM image of single-crystalline ZNA arrays, exhibiting the same areal density as poly-crystalline ZnO nanoawl arrays (see Fig.3 in the manuscript).

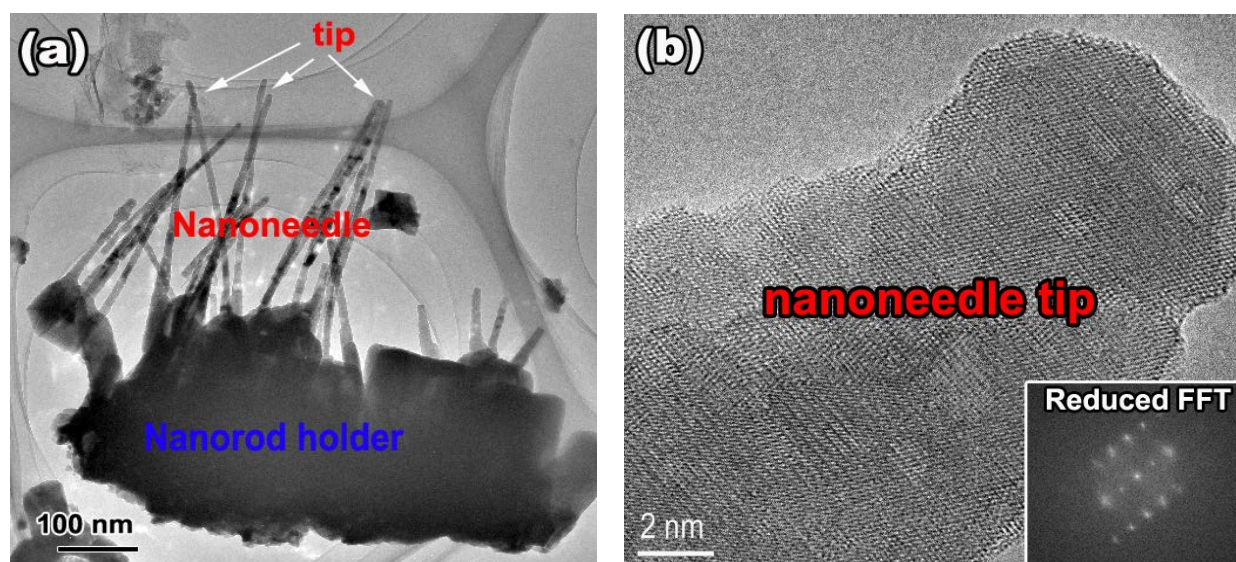

**Fig. S2** (a) TEM image of single-crystalline ZNA arrays, exhibiting the same morphology and size as poly-crystalline ZnO nanoawl arrays (see Fig.6 in the manuscript), (b) HRTEM image of a nanoneedle tip, showing the single-crystalline structure.
